# Supplementary material for: Isolation and evolutionary analyses of porcine epidemic diarrhea virus in Asia
Source: PubMed Central journal article supplement (PMC7583610; doi:10.7717/peerj.10114), 2020-10-20
Supplement: peerj-08-10114-s001.pdf [file peerj-08-10114-s001.pdf]

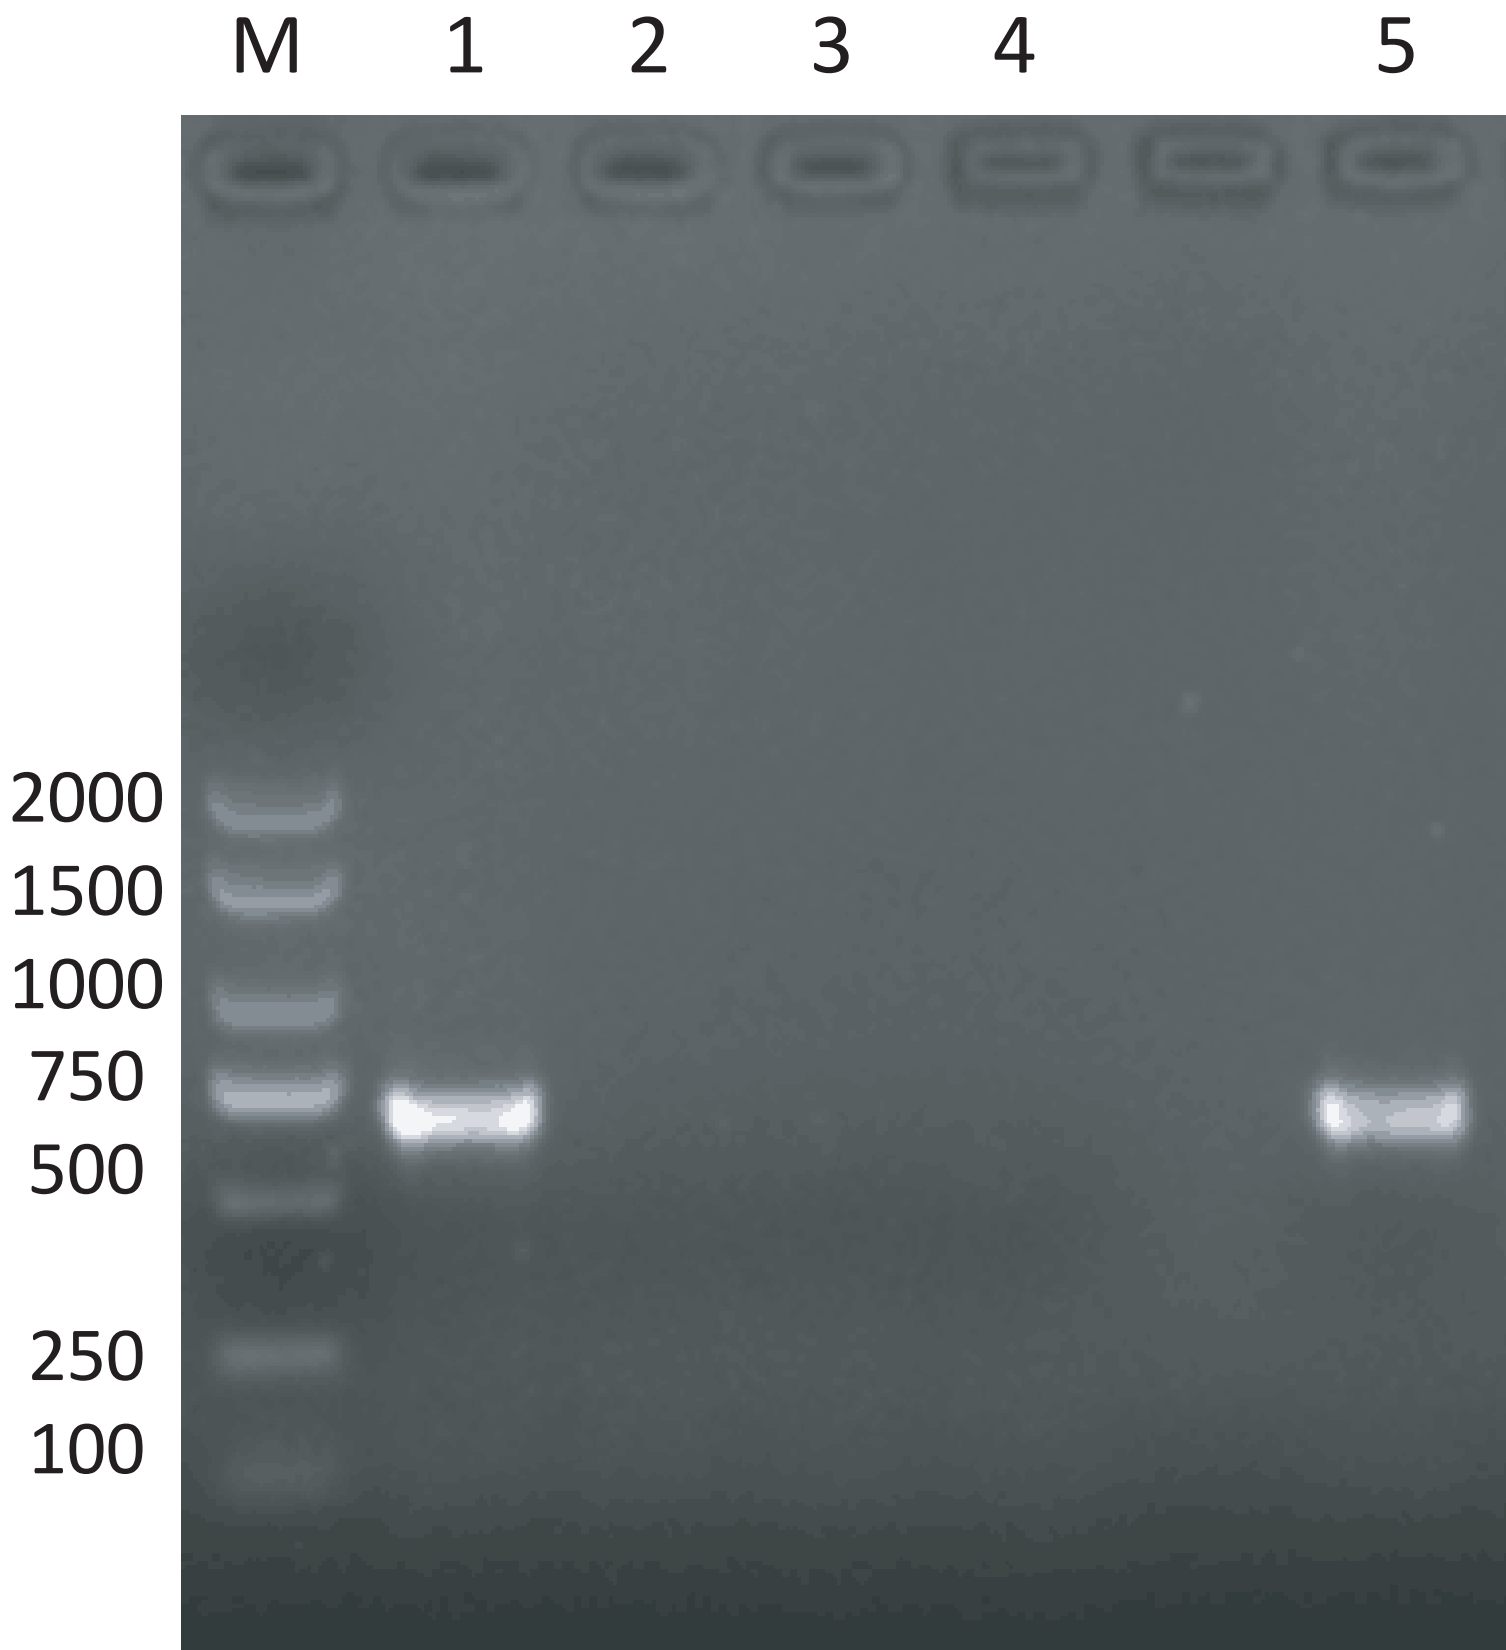

M: DL2000 marker

1. Sample detected for PEDV

2. Sample detected for TGEV

3. Sample detected for PoRV

4. Negative control

5. Positive control
