# Supplementary material for: Isolation and evolutionary analyses of porcine epidemic diarrhea virus in Asia
Source: PubMed Central journal article supplement (PMC7583610; doi:10.7717/peerj.10114), 2020-10-20

**A.**

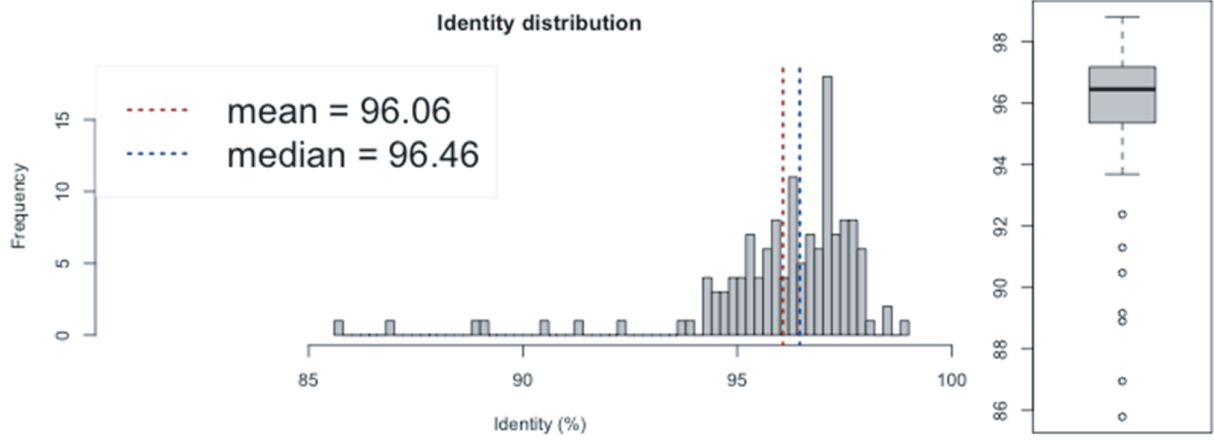

**B.**

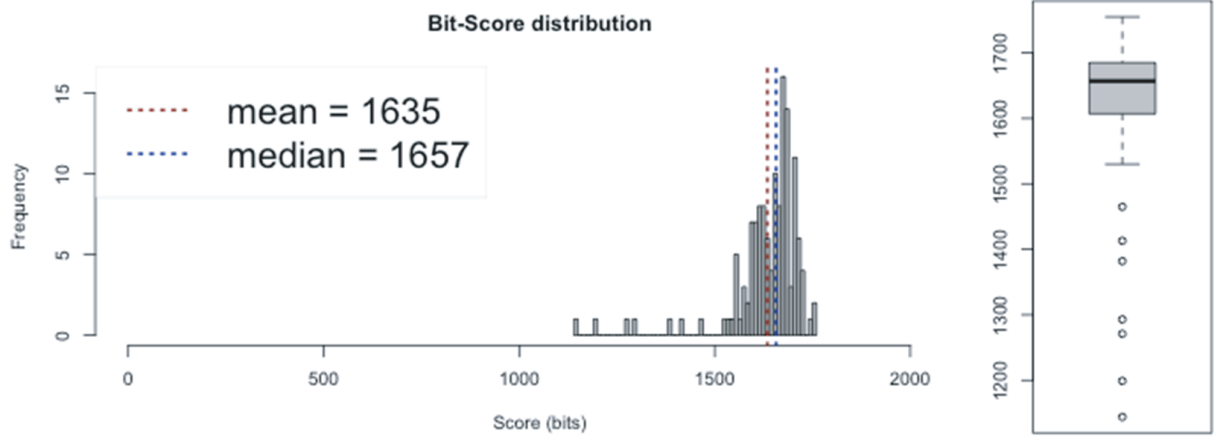

Supplement: peerj-08-10114-s002.pdf [file peerj-08-10114-s002.pdf]
