# Supplementary material for: Isolation and evolutionary analyses of porcine epidemic diarrhea virus in Asia
Source: PubMed Central journal article supplement (PMC7583610; doi:10.7717/peerj.10114), 2020-10-20
Supplement: peerj-08-10114-s003.pdf [file peerj-08-10114-s003.pdf]

cv777-s 1 10 20 30 40 50 60 70 80 90 100 110 120 130  
hb2018-s MRSLLYFWLLPVLPTLSLPQDVTRCSITNFRRFSSKFNQAPAVVVLGGYLP SMNS...SSWYCGTGIE TASGVHGIFLSYIDS GQGFIEIGISQEPFDPSPGYQLYLHKATNGNTNAIARLRICQFFDNKTLGPTVNDV

cv777-s 140 150 160 170 180 190 200 210 220 230 240 250 260 270  
hb2018-s TTGRNCLFNKAIPAYMRD GKD I VVGITWDNDRVTVFA DKIYHFY LKNDWSRVATRCYNRRS CAMQYVY PTTYMLNVTSAGEDGI YEPCTANC I GYAANVFATD SNGHIPEGFSSFNWFLLSNDSTLHGKVVSNQPLLVN

cv777-s 280 290 300 310 320 330 340 350 360 370 380 390 400 410 420  
hb2018-s CLLA L PKIYGLGQFFSNH TMDGVCNGAAV DRAPEALRFNINDTSVILAEGSIVLHTALGTNLSFVCSNSSDPHLA I FAIPLGAT E VPHYCFKVDYNSVYKFLAVLPPVREIVITKYGDVYVNGFGYLLHGLLDAVTI

cv777-s 430 440 450 460 470 480 490 500 510 520 530 540 550 560  
hb2018-s NFTGHGTDDVSGFWTIAS TNFVDALIEVQGT S IQRILYCDPVSQKCSQVAFDLDGDFYPISSRNLLSHEQPI SFVTLPSFNDHSFVNITVSA A FGGLS SANLVASD TTINGFSSFCVDTROFTI I L FYNVNTSYGYVSK

cv777-s 570 580 590 600 610 620 630 640 650 660 670 680 690 700  
hb2018-s SODSNCPFTLQSVNDYLSFSKFCVSTSLLA CACTIDLFGYPA FGSQV K I TSLYFQFTKGLITGTPKPLEG I TDVSMFLDVCTKYTIYGFKGEGIIITLNS I LAGVYYTSDSGQLLAFKNVTS GAVYSVTPCSFSEQAAY

cv777-s 710 720 730 740 750 760 770 780 790 800 810 820 830 840  
hb2018-s V NDDIVGVISLS S STFN S TRELPGFFYHSNDGSGNCTEPVLVYSNIGVCKSGSIGYVPSQ Y GQVKIAPT VTGNIS IPTNFSMSIRTEYLQLYNTPVSDCATYVCGNSRCKQLLTQYTAACKTIESALQLSARLESVEVNS

cv777-s 850 860 870 880 890 900 910 920 930 940 950 960 970 980  
hb2018-s MLTISEEALQLATISSFNGDGYNFTNVLGASVYDPASGRVVQKRS V EDLLFNKVVVTNGLTVD EDYKRCNSGRSVADLVCAQYSGVMVLPGVVDAEKLHMYSASLIGGMALGG I T A A A A L P F S Y A V Q A R L N Y L A L Q T D V L

cv777-s 990 1000 1010 1020 1030 1040 1050 1060 1070 1080 1090 1100 1110 1120 1130  
hb2018-s QRNQLLAESFN SAIGNITS AFESVKEAISQTSKGLNTVAHALTKVQEVVNSQ S A L N Q L T V Q L Q H N F Q A I S S S I D D I Y S R L D I L S A D V Q V D R L I T G R L S A L N A F V A Q T L T K Y T E V Q A S R K L A Q Q K V N E C V K S Q S Q R Y G F C G

cv777-s 1140 1150 1160 1170 1180 1190 1200 1210 1220 1230 1240 1250 1260 1270  
hb2018-s GDGEHIFSLVQAAPQGLLFLHTVLPVPGDFV N V I A I A G L C V N D E I A L T L R E P G L V L F T H E L Q N H T A T E Y F V S S R R M F E P R K P T V S D E V O I E S C V V T Y V N L T S D O L P D V I P D Y I D V N K T L D E I L S L P N R T G P S L P L D V F N A T Y

cv777-s 1280 1290 1300 1310 1320 1330 1340 1350 1360 1370 1380  
hb2018-s LNL TGEIADLEQRSESLRNTTEEL R S L I N N I N N T L V D L E W L N R V E T Y I K W P W W V W L I I V I V L I P V V S L L V F C C I S T G C C G C C G C C G A C F S G C C R G P R L Q P Y E V F E K V H V Q
