# Supplementary material for: Isolation and evolutionary analyses of porcine epidemic diarrhea virus in Asia
Source: PeerJ. 2020 Oct 20;8:e10114. doi: 10.7717/peerj.10114 (PMC7583610; doi:10.7717/peerj.10114)
Supplement: Supplemental Information 4 [file peerj-08-10114-s004.xlsx]

## Sheet: Sheet2
GI	NAME	LENGTH	YEAR	COUNTRY
EF185992.1	Porcine epidemic diarrhea virus strain LZC from China	28042	2006	China
JN547228.1	Porcine epidemic diarrhea virus strain CHS	28026	1986	China
JN825712.1	Porcine epidemic diarrhea virus isolate BJ-2011-1	28038	2011	China
JQ282909.1	Porcine epidemic diarrhea virus strain CHFJND-32011	28038	2011	China
JX088695.1	Porcine epidemic diarrhea virus strain GD-B	28038	2012	China
JX112709.1	Porcine epidemic diarrhea virus strain GD-A	28035	2012	China
JX188454.1	Porcine epidemic diarrhea virus strain AJ1102	28044	2011	China
JX261936.1	Porcine epidemic diarrhea virus strain CHGD-01	28047	2011	China
JX489155.1	Porcine epidemic diarrhea virus strain LC	28047	2011	China
JX524137.1	Porcine epidemic diarrhea virus strain ZJCZ4	28038	2011	China
JX560761.1	Porcine epidemic diarrhea virus strain SD-M	27953	2012	China
JX647847.1	Porcine epidemic diarrhea virus strain GD-1	28047	2011	China
KC109141.1	Porcine epidemic diarrhea virus isolate JS2008	27953	2008	China
KC140102.1	Porcine epidemic diarrhea virus strain CHFJZZ-92012	28038	2012	China
KC196276.1	Porcine epidemic diarrhea virus strain CHZMDZY11	28038	2011	China
KC210145.1	Porcine epidemic diarrhea virus strain AH2012	28039	2012	China
KC210146.1	Porcine epidemic diarrhea virus strain JS2008	27954	2008	China
KC210147.1	Porcine epidemic diarrhea virus strain JS-HZ2012	28037	2012	China
KF384500.1	Porcine epidemic diarrhea virus strain CHGDGZ2012	28035	2012	China
KF760557.2	Porcine epidemic diarrhea virus strain CHJX-12013	28052	2013	China
KF761675.1	Porcine epidemic diarrhea virus strain CHYNKM-82013	28038	2013	China
KF840537.1	Porcine epidemic diarrhea virus isolate CHZJCX-12012	27992	2012	China
KJ020932.1	Porcine epidemic diarrhea virus isolate CHYJ130330	28038	2013	China
KJ158152.1	Porcine epidemic diarrhea virus strain AH-M	27953	2011	China
KJ196348.1	Porcine epidemic diarrhea virus strain SHQPYM2013	28038	2013	China
KJ526096.1	Porcine epidemic diarrhea virus isolate CHJX-22013	28050	2013	China
KJ777677.1	Porcine epidemic diarrhea virus strain LZW isolate FGE_20140427	28038	2012	China
KJ777678.1	Porcine epidemic diarrhea virus strain LZW isolate CPGEN_20140427	28038	2012	China
KM089829.1	Porcine epidemic diarrhea virus strain GDS01	28047	2012	China
KM242131.1	Porcine epidemic diarrhea virus strain CHGDZQ2014	28038	2014	China
KM609203.1	Porcine epidemic diarrhea virus strain PEDV-1C	28047	2012	China
KM609204.1	Porcine epidemic diarrhea virus strain PEDV-7C	28050	2011	China
KM609206.1	Porcine epidemic diarrhea virus strain PEDV-10F	28050	2012	China
KM609207.1	Porcine epidemic diarrhea virus strain PEDV-14	28050	2011	China
KM609208.1	Porcine epidemic diarrhea virus strain PEDV-15F	28050	2012	China
KM609209.1	Porcine epidemic diarrhea virus strain PEDV-CHZ	28050	2013	China
KM609210.1	Porcine epidemic diarrhea virus strain PEDV-LY	28038	2014	China
KM609211.1	Porcine epidemic diarrhea virus strain PEDV-LS	28038	2014	China
KM609212.1	Porcine epidemic diarrhea virus strain PEDV-LYG	28038	2014	China
KM609213.1	Porcine epidemic diarrhea virus strain PEDV-WS	28038	2014	China
KM887144.1	Porcine epidemic diarrhea virus isolate CHM2013	27994	2013	China
KP162057.1	Porcine epidemic diarrhea virus isolate SC1402	27959	2014	China
KP403802.1	Porcine epidemic diarrhea virus isolate HLJBY	27953	2014	China
KP728470.1	Porcine epidemic diarrhea virus strain SQ2014	27953	2014	China
KP765609.1	Porcine epidemic diarrhea virus strain FL2013	28056	2013	China
KP890336.1	Porcine epidemic diarrhea virus strain CHHNYF14	27996	2014	China
KR095279.1	Porcine epidemic diarrhea virus strain CHHNQX-314	27997	2015	China
KR153325.1	Porcine epidemic diarrhea virus strain CHGDZH021401	27995	2014	China
KR153326.1	Porcine epidemic diarrhea virus strain CHGDZHDM1401	27993	2014	China
KR809885.1	Porcine epidemic diarrhea virus isolate CHHNAY2015	28038	2015	China
KR818832.1	Porcine epidemic diarrhea virus strain XY2013	28047	2013	China
KR818833.1	Porcine epidemic diarrhea virus strain JSHA2013	28047	2013	China
KT021227.1	Porcine epidemic diarrhea virus strain YN1	28038	2013	China
KT021228.1	Porcine epidemic diarrhea virus strain YN15	28034	2013	China
KT021229.1	Porcine epidemic diarrhea virus strain YN30	28028	2013	China
KT021230.1	Porcine epidemic diarrhea virus strain YN60	28028	2014	China
KT021231.1	Porcine epidemic diarrhea virus strain YN90	28028	2014	China
KT021232.1	Porcine epidemic diarrhea virus strain YN144	28028	2014	China
KT021233.1	Porcine epidemic diarrhea virus strain YN200	28028	2014	China
KT199103.1	Porcine epidemic diarrhea virus isolate CHHNLH2015	28038	2015	China
KT323979.1	Porcine epidemic diarrhea virus strain CV777	27953	1998	China
KT323980.1	Porcine epidemic diarrhea virus strain LNCT2	28038	2014	China
KU252649.1	Porcine epidemic diarrhea virus strain YC2014	28077	2014	China
KU380331.1	Porcine epidemic diarrhea virus isolate CH-SD01	28035	2015	China
KU558701.1	Porcine epidemic diarrhea virus isolate ZJUG22013	28038	2013	China
KU646831.1	Porcine epidemic diarrhea virus isolate AH201212	28036	2012	China
KU664503.1	Porcine epidemic diarrhea virus isolate ZJUG12013	27994	2013	China
KU847996.1	Porcine epidemic diarrhea virus strain ZL29	27989	2015	China
KU975389.1	Porcine epidemic diarrhea virus strain CHSCCD2014	28044	2014	China
KX016034.1	Porcine epidemic diarrhea virus isolate CHGDZHDM1401	27993	2014	China
KX064280.1	Porcine epidemic diarrhea virus isolate SD2014	28036	2014	China
KX066126.1	Porcine epidemic diarrhea virus strain BJ-2011-C	28038	2011	China
KX534205.1	Porcine epidemic diarrhea virus isolate JSLS-12015	27861	2015	China
KX534206.1	Porcine epidemic diarrhea virus isolate JS-22015	27930	2015	China
KX550281.1	Porcine epidemic diarrhea virus strain ZJ15XS0101 P1	28067	2015	China
KX580953.1	Porcine epidemic diarrhea virus strain KB2013-4	28038	2013	China
KX791060.1	Porcine epidemic diarrhea virus isolate CHSD2014	28035	2014	China
KX812523.1	Porcine epidemic diarrhea virus isolate XM1-2	28038	2016	China
KX812524.1	Porcine epidemic diarrhea virus isolate XM2-4	28038	2016	China
KX839246.1	Porcine epidemic diarrhea virus strain 85-7	28015	2013	China
KX839247.1	Porcine epidemic diarrhea virus strain 85-7-mutant1	27988	2015	China
KX839248.1	Porcine epidemic diarrhea virus strain 85-7-mutant2	27533	2015	China
KX839249.1	Porcine epidemic diarrhea virus strain 85-7-mutant3	28000	2015	China
KX839250.1	Porcine epidemic diarrhea virus strain 85-7-mutant4	27860	2015	China
KX839251.1	Porcine epidemic diarrhea virus strain 85-7-mutant5	27990	2015	China
KX883635.1	Porcine epidemic diarrhea virus strain WHZHC72223 ORF1ab	28033	2014	China
KX981440.1	Porcine epidemic diarrhea virus isolate CHHNZZ472016	28124	2016	China
KY007139.1	Porcine epidemic diarrhea virus isolate PEDV-Hjms	28017	2015	China
KY007140.1	Porcine epidemic diarrhea virus isolate PEDV-LNsy	28050	2015	China
KY070587.1	Porcine epidemic diarrhea virus isolate JSCZ1601	28045	2016	China
KY420075.1	Porcine epidemic diarrhea virus strain PEDV-SX	27967	2015	China
KY486713.1	Porcine epidemic diarrhea virus strain 85-7-A40	27988	2015	China
KY486714.1	Porcine epidemic diarrhea virus strain 85-7-C40	28000	2015	China
KY649107.1	Porcine epidemic diarrhea virus strain CH-HNKF-16	28032	2016	China
KY793536.1	Porcine epidemic diarrhea virus strain CHGX2015750A	28038	2015	China
KY928065.1	Porcine epidemic diarrhea virus isolate CH_hubei_2016	28063	2016	China
MF346935.1	Porcine epidemic diarrhea virus isolate CHJLDH2016	28035	2016	China
MF375374.1	Porcine epidemic diarrhea virus isolate CHJXJA2017	28079	2017	China
MF462814.1	Porcine epidemic diarrhea virus strain CHSXYL2016	28063	2016	China
MF782686.1	Porcine epidemic diarrhea virus strain NW17	28010	2015	China
MF782687.1	Porcine epidemic diarrhea virus strain NW8	28038	2015	China
MF807951.1	Porcine epidemic diarrhea virus strain C3-HB2017	28035	2017	China
MF807952.1	Porcine epidemic diarrhea virus strain B5-HB2017	28046	2017	China
MG546687.1	Porcine epidemic diarrhea virus strain CHBJ92015	28038	2015	China
MG546688.1	UNVERIFIED: Porcine epidemic diarrhea virus strain CHBJ22016	28038	2016	China
MG546689.1	UNVERIFIED: Porcine epidemic diarrhea virus strain CHHB92016	28035	2016	China
MG546690.1	Porcine epidemic diarrhea virus strain CHBJ112016	28035	2016	China
MG837011.1	Porcine epidemic diarrhea virus isolate CHNSH-2012-52012	28038	2012	China
MG837012.1	Porcine epidemic diarrhea virus isolate CHNSH-2016-42016	27412	2016	China
MH056658.1	Porcine epidemic diarrhea virus strain JSX2014	28015	2014	China
MH061336.1	Porcine epidemic diarrhea virus strain CHSCGA2017	28029	2017	China
MH061337.1	Porcine epidemic diarrhea virus strain CHSCZG2017	28035	2017	China
MH061338.1	Porcine epidemic diarrhea virus strain CHSCZY442017	28026	2017	China
MH061339.1	Porcine epidemic diarrhea virus strain CHSCAZ102017	28035	2017	China
MH061340.1	Porcine epidemic diarrhea virus strain CHSCZY1032017	28038	2017	China
MH061341.1	Porcine epidemic diarrhea virus strain CHSCLS2018	28035	2018	China
MH061342.1	Porcine epidemic diarrhea virus strain CHSCZJ2018	28038	2018	China
MH061343.1	Porcine epidemic diarrhea virus strain CHSCMY2018	28026	2018	China
MH107321.1	Porcine epidemic diarrhea virus isolate GDS10	28041	2013	China
MH107322.1	Porcine epidemic diarrhea virus isolate GDS23	28038	2012	China
MH117940.1	Porcine epidemic diarrhea virus isolate SDSX16	28036	2016	China
MH581489.1	Porcine epidemic diarrhea virus isolate CHHBTS2017	28066	2017	China
MH708243.1	Porcine epidemic diarrhea virus strain H11-SD2017	28042	2017	China
MH708895.1	Porcine epidemic diarrhea virus isolate FJ2011	28033	2011	China
MH748550.1	Porcine epidemic diarrhea virus strain PEDV JS-A	28045	2017	China
MK250953.1	Porcine epidemic diarrhea virus strain ZJZX2018-C10	28035	2018	China
MK288006.1	Porcine epidemic diarrhea virus isolate FJzz1	28035	2011	China
LC022792.1	Porcine epidemic diarrhea virus genomic RNA	27342	2014	Japan
LC063810.1	Porcine epidemic diarrhea virus genomic RNA	27904	2014	Japan
LC063811.1	Porcine epidemic diarrhea virus genomic RNA	27904	2014	Japan
LC063812.1	Porcine epidemic diarrhea virus genomic RNA	27904	2014	Japan
LC063813.1	Porcine epidemic diarrhea virus genomic RNA	27904	2014	Japan
LC063814.1	Porcine epidemic diarrhea virus genomic RNA	27904	2013	Japan
LC063815.1	Porcine epidemic diarrhea virus genomic RNA	27904	2013	Japan
LC063816.1	Porcine epidemic diarrhea virus genomic RNA	27904	2014	Japan
LC063817.1	Porcine epidemic diarrhea virus genomic RNA	27904	2014	Japan
LC063818.1	Porcine epidemic diarrhea virus genomic RNA	27904	2014	Japan
LC063819.1	Porcine epidemic diarrhea virus genomic RNA	27904	2014	Japan
LC063820.1	Porcine epidemic diarrhea virus genomic RNA	27904	2013	Japan
LC063821.1	Porcine epidemic diarrhea virus genomic RNA	27904	2013	Japan
LC063822.1	Porcine epidemic diarrhea virus genomic RNA	27904	2014	Japan
LC063823.1	Porcine epidemic diarrhea virus genomic RNA	27904	2014	Japan
LC063824.1	Porcine epidemic diarrhea virus genomic RNA	27904	2014	Japan
LC063825.1	Porcine epidemic diarrhea virus genomic RNA	27904	2014	Japan
LC063826.1	Porcine epidemic diarrhea virus genomic RNA	27904	2014	Japan
LC063827.1	Porcine epidemic diarrhea virus genomic RNA	27904	2014	Japan
LC063828.1	Porcine epidemic diarrhea virus genomic RNA	27322	2014	Japan
LC063829.1	Porcine epidemic diarrhea virus genomic RNA	27904	2014	Japan
LC063830.1	Porcine epidemic diarrhea virus genomic RNA	27904	2014	Japan
LC063831.1	Porcine epidemic diarrhea virus genomic RNA	27904	2014	Japan
LC063832.1	Porcine epidemic diarrhea virus genomic RNA	27904	2014	Japan
LC063833.1	Porcine epidemic diarrhea virus genomic RNA	27904	2014	Japan
LC063834.1	Porcine epidemic diarrhea virus genomic RNA	27904	2014	Japan
LC063835.1	Porcine epidemic diarrhea virus genomic RNA	27904	2014	Japan
LC063836.1	Porcine epidemic diarrhea virus genomic RNA	27904	2013	Japan
LC063837.1	Porcine epidemic diarrhea virus genomic RNA	27904	2014	Japan
LC063838.1	Porcine epidemic diarrhea virus genomic RNA	27481	2014	Japan
LC063839.1	Porcine epidemic diarrhea virus genomic RNA	27904	2014	Japan
LC063840.1	Porcine epidemic diarrhea virus genomic RNA	27904	2014	Japan
LC063841.1	Porcine epidemic diarrhea virus genomic RNA	27904	2014	Japan
LC063842.1	Porcine epidemic diarrhea virus genomic RNA	27904	2014	Japan
LC063843.1	Porcine epidemic diarrhea virus genomic RNA	27904	2014	Japan
LC063844.1	Porcine epidemic diarrhea virus genomic RNA	27895	2014	Japan
LC063845.1	Porcine epidemic diarrhea virus genomic RNA	27895	2014	Japan
LC063846.1	Porcine epidemic diarrhea virus genomic RNA	27895	2013	Japan
LC063847.1	Porcine epidemic diarrhea virus genomic RNA	27895	2014	Japan
GU937797.1	Porcine epidemic diarrhea virus isolate SM98	27994	2010	South Korea
JQ023161.1	Porcine epidemic diarrhea virus strain virulent DR13	28029	2009	South Korea
KJ588062.1	Porcine epidemic diarrhea virus isolate KUIDL-PED-2014-007	27759	2014	South Korea
KJ588063.1	Porcine epidemic diarrhea virus isolate KUIDL-PED-2014-002	27759	2014	South Korea
KJ588064.1	Porcine epidemic diarrhea virus isolate KUIDL-PED-2014-001	27759	2014	South Korea
KJ623926.1	Porcine epidemic diarrhea virus strain K14JB01	28038	2014	South Korea
KJ662670.1	Porcine epidemic diarrhea virus isolate KNU-1305	28038	2013	South Korea
KM403155.1	Porcine epidemic diarrhea virus isolate KNU-1406-1	28029	2014	South Korea
KR873431.1	Porcine epidemic diarrhea virus isolate KNU-141112-feces	28038	2014	South Korea
KR873434.1	Porcine epidemic diarrhea virus isolate KNU-141112-P5	28038	2014	South Korea
KR873435.1	Porcine epidemic diarrhea virus isolate KNU-141112-P10	28038	2014	South Korea
KY825240.1	Porcine epidemic diarrhea virus isolate KNU-141112-S DEL2	28032	2016	South Korea
KY825241.1	Porcine epidemic diarrhea virus isolate KNU-141112-S DEL2ORF3	27985	2016	South Korea
KY825242.1	Porcine epidemic diarrhea virus isolate KNU-141112-S DEL5	28020	2016	South Korea
KY825243.1	Porcine epidemic diarrhea virus isolate KNU-141112-S DEL5ORF3	27974	2016	South Korea
KY963963.1	Porcine epidemic diarrhea virus isolate KNU-1601	28053	2016	South Korea
MF281416.1	Porcine epidemic diarrhea virus isolate NB1	28005	2017	South Korea
MF737355.1	Porcine epidemic diarrhea virus isolate KUPE21	28038	2001	South Korea
MG781192.1	Porcine epidemic diarrhea virus strain PPC 14	27962	2014	South Korea
MH052681.1	Porcine epidemic diarrhea virus isolate KNU-1702	28029	2017	South Korea
MH052682.1	Porcine epidemic diarrhea virus isolate KNU-1703	28038	2017	South Korea
MH052683.1	Porcine epidemic diarrhea virus isolate KNU-1704	28038	2017	South Korea
MH052684.1	Porcine epidemic diarrhea virus isolate KNU-1705	27999	2017	South Korea
MH052685.1	Porcine epidemic diarrhea virus isolate KNU-1706	28038	2017	South Korea
MH052687.1	Porcine epidemic diarrhea virus isolate KNU-1708	28038	2017	South Korea
MH052688.1	Porcine epidemic diarrhea virus isolate KNU-1709	28038	2017	South Korea
MH052689.1	Porcine epidemic diarrhea virus isolate KNU-1710	28032	2017	South Korea
MH243316.1	Porcine epidemic diarrhea virus isolate KNU-1804	28038	2018	South Korea
MH243318.1	Porcine epidemic diarrhea virus isolate KNU-1806	28038	2018	South Korea
MH243319.1	Porcine epidemic diarrhea virus isolate KNU-1807	28017	2018	South Korea
KY929405.1	Porcine epidemic diarrhea virus strain PT-P5	28038	2015	Taiwan
KY929406.1	Porcine epidemic diarrhea virus strain PT-P96	28038	2016	Taiwan
KR610991.1	Porcine epidemic diarrhea virus clone EAS1	28033	2014	Thailand
KR610992.1	Porcine epidemic diarrhea virus clone EAS2	28033	2014	Thailand
KR610993.1	Porcine epidemic diarrhea virus clone CBR1	27409	2014	Thailand
KR610994.1	Porcine epidemic diarrhea virus clone CBR2	27409	2014	Thailand
LC053455.1	Porcine epidemic diarrhea virus genomic RNA	27991	2010	Thailand
KJ960178.1	Porcine epidemic diarrhea virus clone VNJFP1013_12013Vinh	28035	2013	Vietnam
KJ960179.1	Porcine epidemic diarrhea virus clone VNVAP1113_12013Vung	28035	2013	Vietnam
KJ960180.1	Porcine epidemic diarrhea virus clone	28035	2013	Vietnam
KT941120.1	Porcine epidemic diarrhea virus strain HUA-14PED96	27966	2014	VietNam
